# Supplementary material for: Concerted EP2 and EP4 Receptor Signaling Stimulates Autocrine Prostaglandin E2 Activation in Human Podocytes
Source: Cells. 2020 May 19;9(5):1256. doi: 10.3390/cells9051256 (PMC7290667; doi:10.3390/cells9051256)
Supplement: Supplementary file 1 [file cells-09-01256-s001.pdf]

## Supplemental Material

### S 1. Immunofluorescence of Synaptopodin, Podocin, and Nephtrin

Differentiated phenotype of hPC was confirmed by analysis of the marker synaptopodin by immunofluorescence. Briefly, cells were seeded on 8-chamber-glass slides at  $12 \times 10^3$  cells per well (NUNC Lab-Tek II Chamber Slide, cat. no. 154534) and kept in RPMI-1640 medium with supplements for adherence overnight. Medium was then discarded and cells were washed twice with PBS. Fixation of cells was achieved with 80% acetone/PBS at 4 °C for 10 min. Afterwards, cells were washed three times with cold PBS. Blocking solution consisting of PBS+5%FBS was applied for 20 min at room temperature. Primary antibody mouse anti-synaptopodin (cat. no. 65194, Progen Biotechnik GmbH, Germany) diluted 1:25 was added and incubation lasted 1 h at room temperature. After three washing steps, the secondary antibody donkey anti-mouse IgG Alexa Fluor Plus 594 (cat. no. A32744, Thermo Fisher Scientific, Germany) diluted 1:200 was added and incubated for 1 h at room temperature in darkness. Cells were washed twice with PBS and nuclei were stained with 4',6-diamidino-2-phenylindole (DAPI, cat. no. P36931, Invitrogen, Germany) for 24 h at room temperature in darkness. Immunofluorescence was detected at 405 nm (DAPI) and 594 nm (donkey anti mouse for synaptopodin) on a Leica confocal SPE microscope (Figure S1 (a) and (b)).

Additionally, immunofluorescence for the podocyte markers podocin and nephrin was performed in 24-well plates. For nephrin, the protocol of synaptopodin staining was followed using rabbit anti-nephrin (cat. no. PA5-72826, Invitrogen, Germany) diluted 1:50 as primary antibody and goat anti-rabbit Alexa Fluor Plus 488 (cat. no. A32732, Invitrogen, Germany) 1:200 as secondary antibody. Nuclei staining was performed using DAPI 1:3000 (cat. no. D1306, Thermo Fisher, Germany) with incubation for 10 min at room temperature in darkness. Cells were finally washed twice with PBS and covered with Fluoromount (cat. no. 00-4958-02, Invitrogen, Germany). For podocin, fixation of cells was achieved by 4% paraformaldehyde+1 mM  $MgCl_2$ +0.5% Triton X100 using 800  $\mu$ L per well and an incubation time of 10 min at room temperature. After three washing steps with PBS, blocking solution consisting of PBS+5% FBS+0.1% Triton X100 was added to each well and incubated for 20 min at room temperature. Primary antibody rabbit anti-podocin (cat. no. P0372, Sigma-Aldrich, Germany) diluted 1:50 was added and incubation lasted 1 h at room temperature. Afterwards, the same protocol was followed as for podocin staining. Immunofluorescence was detected at 405 nm (DAPI) and 488 nm (goat anti-rabbit for podocin and nephrin) on an EVOS fluorescence microscope (Thermo Fisher, Germany) (Figure S1 (c)-(e)).

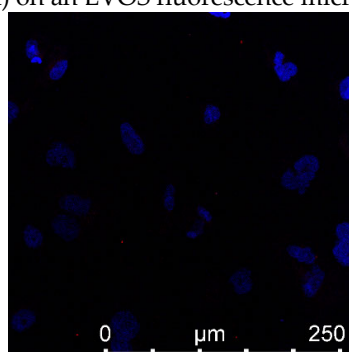

(a)

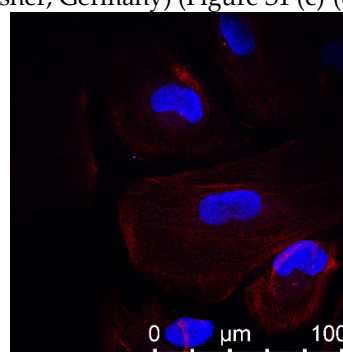

(b)

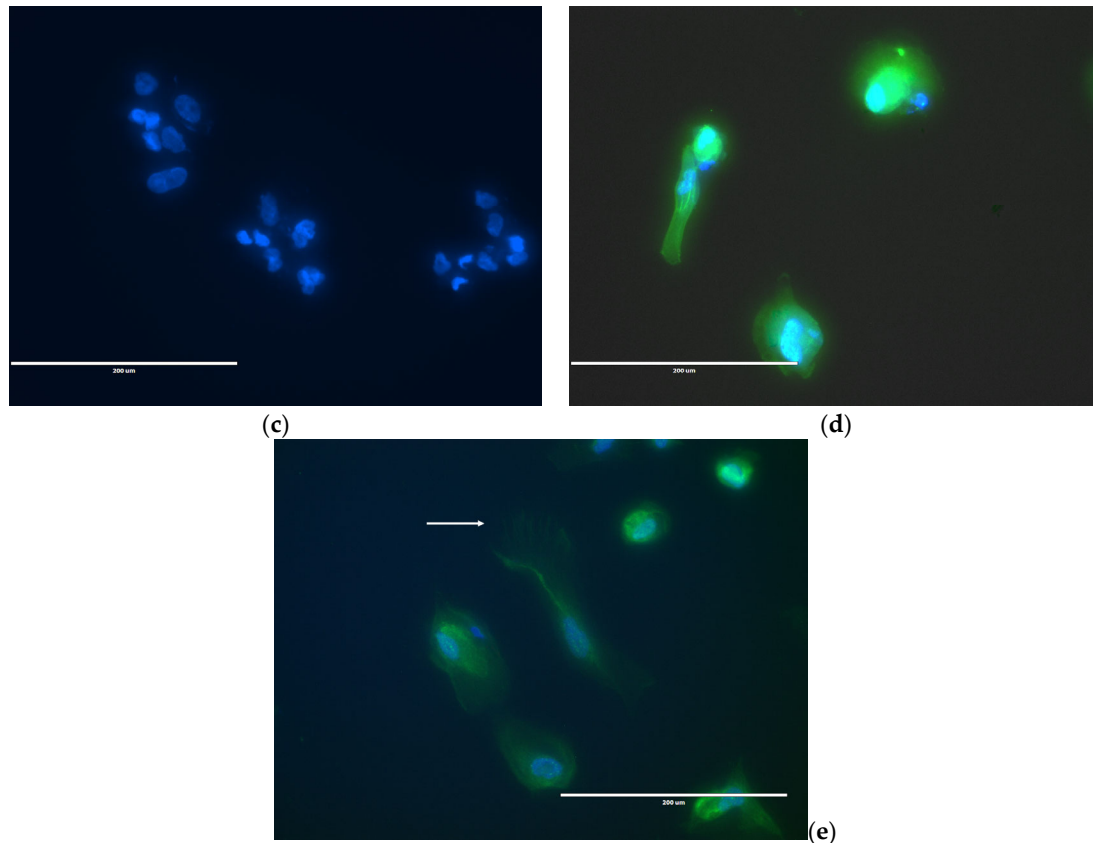

**Figure S1.** Differentiation of hPC was confirmed by immunofluorescence of synaptopodin, podocin, and nephrin. (a) Control without primary antibody revealed no unspecific binding of secondary antibody donkey anti-mouse IgG Alexa Fluor Plus 594, overlay with DAPI indicated nuclei. Scale bar 250  $\mu\text{m}$ ; (b) Synaptopodin (red) was expressed by differentiated hPC. Nuclei staining was performed with DAPI. Scale bar 100  $\mu\text{m}$ ; (c) Control without primary antibody revealed no unspecific binding of secondary antibody goat anti-rabbit Alexa Fluor Plus 488, overlay with DAPI indicated nuclei. Scale bar 200  $\mu\text{m}$ ; (d) Podocin (green) and (e) nephrin (green) were expressed by differentiated hPC. Foot processes are visible in (e) indicated by white arrow. Scale bars 200  $\mu\text{m}$ .

## S 2. Additional Characterization of hPC

Cellular appearance differed between differentiated hPC exhibiting an arborized shape (Figure S2a), and proliferating, undifferentiated hPC that showed typical “cobblestone” pattern (Figure S2b). This appearance was also described before [1]. Furthermore, synaptopodin (*SYNPO*) gene expression (forward primer (5′-3′) – gaggacctagcagacgttg, reverse primer (5′-3′) – tctgagtaccctccatgct) was shown on differentiated hPC, while undifferentiated hPC did not express *SYNPO* mRNA (Figure S2c). Additionally, nephrin and podocin protein were detected by western blot using rabbit anti-nephrin antibody (cat. no. PA5-72826, Thermo Scientific) and rabbit anti-podocin antibody (cat. no. P0372, Sigma), both diluted 1:500 and incubated at 4 °C overnight as primary antibodies and horseradish peroxidase conjugated goat anti-rabbit (cat. no. sc-2004, Santa Cruz Biotechnology) as secondary antibody. Nephrin and podocin were expressed on differentiated and proliferating podocytes, albeit the undifferentiated hPC exhibited weaker expression of both (Figure S2d, e).

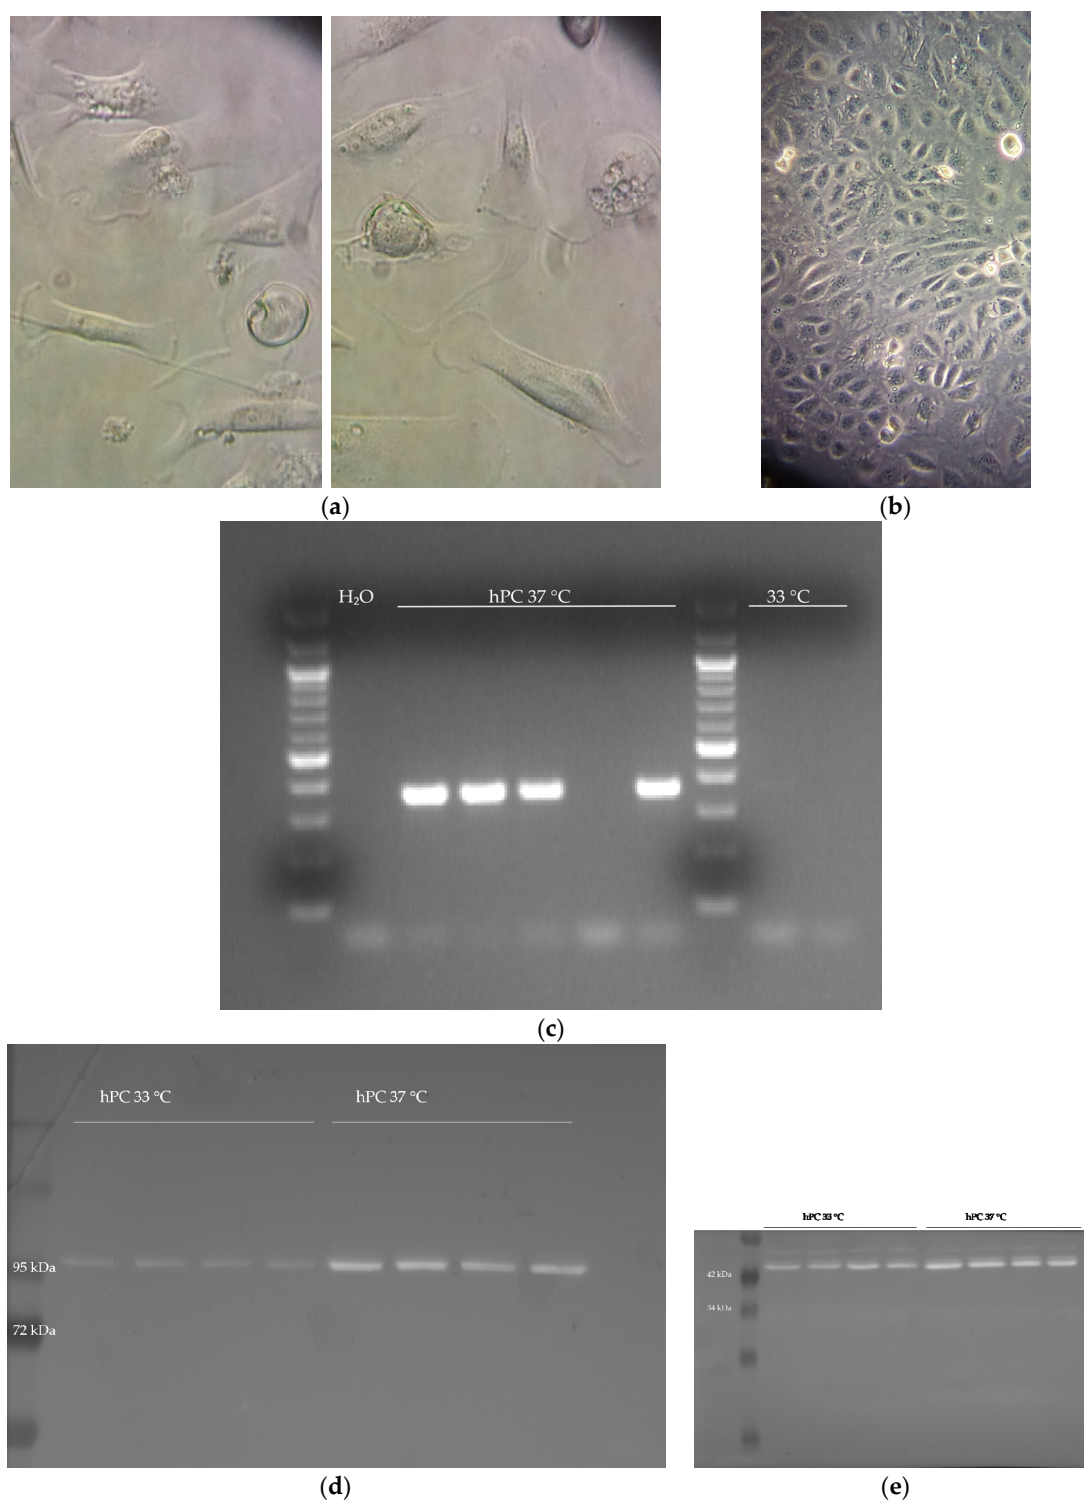

**Figure S2.** Characterization of differentiated and undifferentiated hPC. Light microscopy revealed an arborized shape of differentiated hPC at 37 °C (a), and a cobblestone pattern of undifferentiated hPC at 33 °C (b); (c) PCR revealed *SYNPO* gene expression in differentiated hPC ("hPC 37 °C") and no expression in undifferentiated hPC ("33 °C"); (d) nephrin and podocin (e) protein were detected by western blot in undifferentiated ("hPC 33 °C") and differentiated ("hPC 37 °C") hPC.

### S 3. Expression of EP in hPC

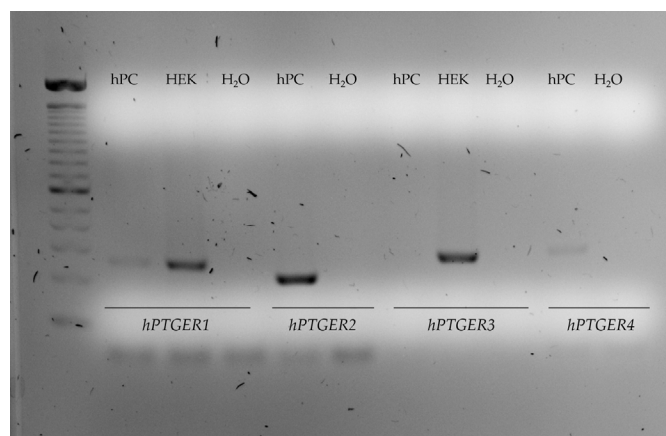

**Figure S3.** Characterization of hPC for EP receptor expression. *PTGER1* (EP1), *PTGER2* (EP2), and *PTGER4* (EP4) mRNA is present in differentiated hPC. HEK293 (HEK) served as a positive control where indicated.

#### S 4. *COX2* expression in hPC after co-incubation with $\text{PGE}_2$ 1 $\mu\text{M}$ and EP2 antagonist 1 $\mu\text{M}$

In a pilot test, we analyzed whether the selective EP2 antagonist PF-04418948 (1  $\mu\text{M}$ ) could abolish the effects of 1  $\mu\text{M}$   $\text{PGE}_2$  on *COX2* mRNA expression. Stimulation of hPC with  $\text{PGE}_2$  1  $\mu\text{M}$  for 2 h revealed an increase in *COX2* mRNA (Figure S4). Upon  $\text{PGE}_2$  stimulation, co-incubation with 1  $\mu\text{M}$  of the selective EP2 antagonist PF-04418948 did not inhibit the  $\text{PGE}_2$ -mediated increase in *COX2* mRNA (Figure S4).

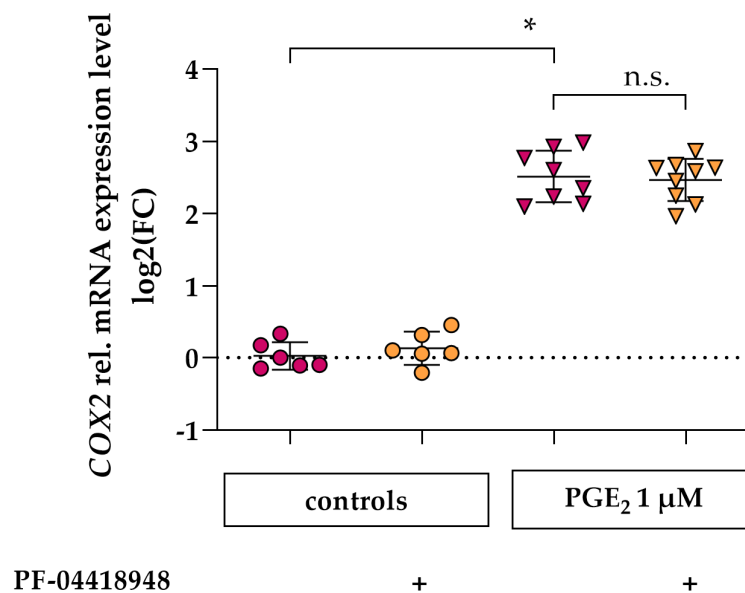

**Figure S4.** EP2 antagonist does not inhibit  $\text{PGE}_2$  mediated *COX2* upregulation when applied with the same concentration as  $\text{PGE}_2$ . *COX2* mRNA-levels following  $\text{PGE}_2$  stimulation with 1  $\mu\text{M}$  for 2 h without concomitant EP2 antagonist (pink triangles) compared to controls without  $\text{PGE}_2$  (pink circles), after co-incubation with 1  $\mu\text{M}$  EP2 antagonist (PF-04418948, orange triangles) compared to controls without  $\text{PGE}_2$  (orange circles). Each datapoint represents a single sample and plotted as mean  $\pm$  SD (horizontal lines) per treatment group. Each treatment group consisted of  $n=6-9$  replicates analyzed in a single experiment. Statistics: \*,  $p<0.01$ ; n.s., not significant, assessed by two-tailed Student's *t*-test.

#### S 5. LC/ESI-MS/MS for Analysis of Prostaglandins

**Table S1.** Multiple Reaction Monitoring in negative mode for LC/ESI-MS/MS.

| Compound Name               | Precursor Ion | Product Ion | Mass Res | CE (V) | Ret Time (min) |
|-----------------------------|---------------|-------------|----------|--------|----------------|
| Tetranor PGFM               | 329           | 249         | Unit     | 26     | 3              |
| Tetranor PGFM               | 329           | 239         | Unit     | 25     | 3              |
| Tetranor PGFM               | 329           | 149         | Unit     | 31     | 3              |
| Tetranor PGFM               | 329           | 129         | Unit     | 33     | 3              |
| 6-keto-PGF1a                | 369.2         | 245         | Wide     | 28     | 4.61           |
| 6-keto-PGF1a                | 369.2         | 207         | Wide     | 22     | 4.61           |
| 6-keto-PGF1a                | 369.2         | 163         | Wide     | 29     | 4.61           |
| TXB2-1                      | 369.2         | 195.1       | Wide     | 12     | 7.04           |
| TXB2-1                      | 369.2         | 169.1       | Wide     | 14     | 7.04           |
| 11 $\beta$ -PGF2a           | 353.2         | 273.2       | Wide     | 22     | 7.3            |
| 11 $\beta$ -PGF2a           | 353.2         | 193.1       | Wide     | 26     | 7.3            |
| 11 $\beta$ -PGF2a           | 353.2         | 291.2       | Wide     | 21     | 7.3            |
| PGF2a                       | 353.2         | 291         | Wide     | 23     | 8.84           |
| PGF2a                       | 353.2         | 273         | Wide     | 22     | 8.84           |
| PGF2a                       | 353.2         | 193         | Wide     | 28     | 8.84           |
| PGF2a                       | 353.2         | 165         | Wide     | 27     | 8.84           |
| PGE2-D4                     | 355.2         | 275.2       | Wide     | 18     | 9.84           |
| PGE2                        | 351.2         | 315.2       | Wide     | 10     | 9.94           |
| PGE2                        | 351.2         | 271.2       | Wide     | 18     | 9.94           |
| PGE2                        | 351.2         | 189.1       | Wide     | 20     | 9.94           |
| PGF2a-15-keto               | 351.2         | 315         | Wide     | 11     | 10.64          |
| PGF2a-15-keto               | 351.2         | 191         | Wide     | 28     | 10.64          |
| PGD2                        | 351.2         | 315.2       | Wide     | 11     | 11.3           |
| PGD2                        | 351.2         | 271.2       | Wide     | 18     | 11.3           |
| PGD2                        | 351.2         | 233.2       | Wide     | 10     | 11.3           |
| PGD2                        | 351.2         | 189.1       | Wide     | 20     | 11.3           |
| PGE2-15-keto                | 349.2         | 287.2       | Wide     | 14     | 11.8           |
| PGE2-15-keto                | 349.2         | 235.2       | Wide     | 14     | 11.8           |
| PGE2-15-keto                | 349.2         | 113.1       | Wide     | 19     | 11.8           |
| PGF2a-13,14-dihydro-15-keto | 353.2         | 291         | Wide     | 22     | 13.7           |
| PGF2a-13,14-dihydro-15-keto | 353.2         | 183         | Wide     | 29     | 13.7           |
| PGF2a-13,14-dihydro-15-keto | 353.2         | 113         | Wide     | 29     | 13.7           |
| PGE2-13,14-dihydro-15-keto  | 351.2         | 315.2       | Wide     | 20     | 14.4           |
| PGE2-13,14-dihydro-15-keto  | 351.2         | 235.2       | Wide     | 22     | 14.4           |
| PGE2-13,14-dihydro-15-keto  | 351.2         | 175.2       | Wide     | 22     | 14.4           |
| PGE2-13,14-dihydro-15-keto  | 351.2         | 113.1       | Wide     | 28     | 14.4           |
| PGD2-13,14-dihydro-15-keto  | 351.2         | 315.2       | Wide     | 12     | 17.7           |
| PGD2-13,14-dihydro-15-keto  | 351.2         | 207.1       | Wide     | 20     | 17.7           |
| PGD2-13,14-dihydro-15-keto  | 351.2         | 175.2       | Wide     | 20     | 17.7           |
| PGD2-13,14-dihydro-15-keto  | 351.2         | 163.1       | Wide     | 26     | 17.7           |
| PGJ2                        | 333.2         | 271.2       | Wide     | 16     | 20.75          |
| PGJ2                        | 333.2         | 233.1       | Wide     | 9      | 20.75          |
| PGJ2                        | 333.2         | 189.1       | Wide     | 17     | 20.75          |
| PGJ2-delta12                | 333.2         | 271.2       | Wide     | 16     | 21.1           |
| PGJ2-delta12                | 333.2         | 233.1       | Wide     | 9      | 21.1           |
| PGJ2-delta12                | 333.2         | 189.1       | Wide     | 17     | 21.1           |
| PGJ2-15-deoxy-delta 12,14   | 315.2         | 271.2       | Wide     | 12     | 26.2           |
| PGJ2-15-deoxy-delta 12,14   | 315.2         | 243.2       | Wide     | 20     | 26.2           |
| PGJ2-15-deoxy-delta 12,14   | 315.2         | 217.1       | Wide     | 18     | 26.2           |

| Compound Name             | Precursor Ion | Product Ion | Mass Res | CE (V) | Ret Time (min) |
|---------------------------|---------------|-------------|----------|--------|----------------|
| PGJ2-15-deoxy-delta 12,14 | 315.2         | 203.1       | Wide     | 24     | 26.2           |
| PGJ2-15-deoxy-delta 12,14 | 315.2         | 158.2       | Wide     | 20     | 26.2           |

1. Saleem, M.A.; O'Hare, M.J.; Reiser, J.; Coward, R.J.; Inward, C.D.; Farren, T.; Xing, C.Y.; Ni, L.; Mathieson, P.W.; Mundel, P. A conditionally immortalized human podocyte cell line demonstrating nephrin and podocin expression. *Journal of the American Society of Nephrology : JASN* **2002**, *13*, 630-638.
